# Supplementary material for: Health Assessment of Electronic Waste Workers in Chile: Participant Characterization
Source: MDPI journal article supplement (doi:10.3390/ijerph16030386), 2019-01-29
Supplement: s1 [file s1]

Table S 1. Symptoms experienced in the last 2 weeks of the study population, by job type and site

|                                       | Informal           |                  | Formal                         |              |
|---------------------------------------|--------------------|------------------|--------------------------------|--------------|
|                                       | Santiago<br>N = 53 | Temuco<br>N = 25 | Recycling<br>company<br>N = 15 | p-value*     |
| - <i>Skin rashes (%)</i>              |                    |                  |                                |              |
| Rarely or never                       | 85                 | 80               | 87                             | 0.842        |
| Occasionally                          | 9.4                | 12               | 13                             |              |
| Always or frequently                  | 5.7                | 8                | 0                              |              |
| - <i>Headache or dizziness (%)</i>    |                    |                  |                                |              |
| Rarely or never                       | 47                 | 52               | 67                             | 0.674        |
| Occasionally                          | 38                 | 44               | 27                             |              |
| Always or frequently                  | 13                 | 4                | 6.7                            |              |
| - <i>Shaking or tremors (%)</i>       |                    |                  |                                |              |
| Rarely or never                       | 93                 | 92               | 100                            | 0.741        |
| Occasionally                          | 5.7                | 8                | 0                              |              |
| Always or frequently                  | 1.9                | 0                | 0                              |              |
| - <i>Blood in urine (%)</i>           |                    |                  |                                |              |
| Rarely or never                       | 94                 | 100              | 100                            | 0.674        |
| Occasionally                          | 3.8                | 0                | 0                              |              |
| Always or frequently                  | 1.9                | 0                | 0                              |              |
| - <i>Blood in stool (%)</i>           |                    |                  |                                |              |
| Rarely or never                       | 98                 | 96               | 100                            | 0.479        |
| Occasionally                          | 0                  | 4                | 0                              |              |
| Always or frequently                  | 1.9                | 0                | 0                              |              |
| - <i>Breathing problems (%)</i>       |                    |                  |                                |              |
| Rarely or never                       | 68                 | 84               | 87                             | 0.288        |
| Occasionally                          | 28                 | 12               | 6.7                            |              |
| Always or frequently                  | 3.8                | 4                | 6.7                            |              |
| - <i>Heart beating abnormally (%)</i> |                    |                  |                                |              |
| Rarely or never                       | 55                 | 88               | 93                             | <b>0.008</b> |
| Occasionally                          | 40                 | 12               | 6.7                            |              |
| Always or frequently                  | 5.7                | 0                | 0                              |              |
| - <i>Loose or watery stools (%)</i>   |                    |                  |                                |              |
| Rarely or never                       | 83                 | 88               | 87                             | 0.408        |
| Occasionally                          | 15                 | 4                | 6.7                            |              |
| Always or frequently                  | 1.9                | 8                | 6.7                            |              |
| - <i>Fever (%)</i>                    |                    |                  |                                |              |
| Rarely or never                       | 89                 | 88               | 100                            | 0.625        |
| Occasionally                          | 9.4                | 12               | 0                              |              |
| Always or frequently                  | 1.9                | 0                | 0                              |              |
| - <i>Nausea or stomach ache (%)</i>   |                    |                  |                                |              |
| Rarely or never                       | 76                 | 76               | 80                             | 0.962        |
| Occasionally                          | 21                 | 20               | 13                             |              |
| Always or frequently                  | 3.8                | 4                | 6.7                            |              |

\*chi2 for the comparison between formal and informal and categories in the variable

Table S 2. Self-report of stress in the study population, by job type and site

| Group                                                          | Informal           |                  | Formal                         | p-value*     |
|----------------------------------------------------------------|--------------------|------------------|--------------------------------|--------------|
|                                                                | Santiago<br>N = 53 | Temuco<br>N = 25 | Recycling<br>company<br>N = 15 |              |
| <b>Stressors by Cohen's perceived stress scale</b>             |                    |                  |                                |              |
| In the last month, how often have you felt:                    |                    |                  |                                |              |
| - Unable to control important things in life (%)               |                    |                  |                                |              |
| Never                                                          | 30                 | 40               | 60                             | 0.388        |
| Almost never                                                   | 23                 | 20               | 13                             |              |
| Sometimes                                                      | 32                 | 24               | 27                             |              |
| Fairly often                                                   | 13                 | 8                | 0                              |              |
| Very often                                                     | 1.9                | 8                | 0                              |              |
| - Confident about ability to handle problems (%)               |                    |                  |                                |              |
| Never                                                          | 5.7                | 0                | 0                              | 0.284        |
| Almost never                                                   | 5.7                | 8                | 0                              |              |
| Sometimes                                                      | 7.5                | 4                | 13                             |              |
| Fairly often                                                   | 51                 | 32               | 33                             |              |
| Very often                                                     | 30                 | 56               | 53                             |              |
| - Things were going your way (%)                               |                    |                  |                                |              |
| Never                                                          | 3.8                | 0                | 6.7                            | 0.301        |
| Almost never                                                   | 7.5                | 4                | 0                              |              |
| Sometimes                                                      | 40                 | 16               | 40                             |              |
| Fairly often                                                   | 42                 | 60               | 40                             |              |
| Very often                                                     | 7.5                | 20               | 13                             |              |
| - Couldn't overcome difficulties (%)                           |                    |                  |                                |              |
| Never                                                          | 28                 | 40               | 27                             | 0.619        |
| Almost never                                                   | 25                 | 32               | 33                             |              |
| Sometimes                                                      | 32                 | 24               | 40                             |              |
| Fairly often                                                   | 11                 | 4                | 0                              |              |
| Very often                                                     | 3.8                | 0                | 0                              |              |
| <b>Other stressors</b>                                         |                    |                  |                                |              |
| - Someone else decide work methods/pace/order (%)              |                    |                  |                                |              |
| Never/Almost never                                             | 83                 | 68               | 73                             | 0.359        |
| Occasionally                                                   | 11                 | 16               | 6.7                            |              |
| Always or frequently                                           | 5.7                | 16               | 20                             |              |
| - Experience violence or harassment at work (%)                |                    |                  |                                |              |
| Never/Almost never                                             | 85                 | 72               | 93                             | 0.066        |
| Occasionally                                                   | 9.4                | 24               | 0                              |              |
| Always or frequently                                           | 5.7                | 4                | 0                              |              |
| Prefer not to answer                                           | 0                  | 0                | 6.7                            |              |
| - Work interfere with family responsibilities/leisure time (%) |                    |                  |                                |              |
| Never/Almost never                                             | 60                 | 60               | 73                             | 0.88         |
| Occasionally                                                   | 26                 | 24               | 20                             |              |
| Always or frequently                                           | 13                 | 16               | 6.7                            |              |
| - Income not sufficient to support family (%)                  |                    |                  |                                |              |
| Never/Almost never                                             | 30                 | 64               | 40                             | <b>0.029</b> |
| Occasionally                                                   | 34                 | 16               | 47                             |              |
| Always or frequently                                           | 36                 | 20               | 13                             |              |

\*chi2 for the comparison between formal and informal and categories in the variable
